# Supplementary material for: Understanding the Effect of Revegetated Shrubs on Energy, Water and Carbon Fluxes in a Desert Steppe Ecosystem Using STEMMUS-SCOPE Model
Source: Copernicus journal article supplement (doi:10.5194/bg-2023-70), 2023-06-01
Supplement: Supplementary file 1 [file bg-2023-70-supplement.pdf]

## Understanding the Effect of Revegetated Shrubs on Energy, Water and Carbon Fluxes in a Desert Steppe Ecosystem Using STEMMUS-SCOPE Model

5 Enting Tang et al.

Correspondence to: Zhongbo Su ([z.su@utwente.nl](mailto:z.su@utwente.nl)), Yijian Zeng ([y.zeng@utwente.nl](mailto:y.zeng@utwente.nl)), Lingtong Du ([dult80@nxu.edu.cn](mailto:dult80@nxu.edu.cn))

### 1 Model Description

#### 10 1.1 Energy fluxes

The SCOPE model constructs the surface energy balance by minimizing the energy balance closure error. The soil surface temperature and leaf temperature of all the layers are iterated until net radiation becomes equal to heat fluxes.

$$e_{bal} = R_n - LE - H - G \quad (S1)$$

15

where the net radiation ( $R_n$ ) in SCOPE is computed by RTMo and RTMt sub-modules, calculating the incident radiation and thermal radiation emitted by the vegetation and soil, respectively. Incoming shortwave and longwave radiation are the main drivers for the RTMo module.

20 The latent heat flux (LE) describes the transfer of heat resulting from water phase changes, such as evaporation or transpiration. It is calculated as Eq.(S2) for leaf and soil elements, respectively:

$$LE = \lambda \frac{q_i - q_a}{r_a + r_s} \quad (S2)$$

25 where  $\lambda$  is the vaporization heat of water [ $\text{J kg}^{-1}$ ].  $q_i$  is the humidity in stomata or soil pores [ $\text{kg m}^{-3}$ ].  $q_a$  is the humidity above the canopy [ $\text{kg m}^{-3}$ ].  $r_a$  is aerodynamic resistance [ $\text{s m}^{-1}$ ], a function of wind speed, canopy height and reference height calculated based on a two-source model (Wallace and Verhoef, 2000).  $r_s$  is stomatal resistance ( $r_{sc}$ ) or soil surface resistance ( $r_{ss}$ ) [ $\text{s m}^{-1}$ ]. Within the iteration of the energy balance module, the aerodynamic and stomatal resistances are also updated because the atmospheric stability and vegetation  
30 photosynthesis are influenced by leaf temperatures.

$$r_{ss} = \exp(aa + bb - aa \cdot \frac{\theta - \theta_r}{\theta_f - \theta_r}) \quad (S3)$$

$$r_{sc} = \frac{1}{g_s} = \frac{C_s - C_i}{1.6 \times A_n} \frac{\rho_a}{M_a} \frac{10^{12}}{p} \quad (S4)$$

35 where  $aa$  and  $bb$  are user-defined coefficients.  $\theta$  is the volumetric soil water content [ $\text{m}^3 \text{m}^{-3}$ ].  $\theta_r$  is the residual water content [ $\text{m}^3 \text{m}^{-3}$ ].  $\theta_f$  is the field capacity [ $\text{m}^3 \text{m}^{-3}$ ].  $g_s$  is the stomatal conductance, which is defined as the inverse of  $r_{sc}$ .  $A_n$  is the net photosynthesis rate [ $\mu\text{mol m}^{-2} \text{s}^{-1}$ ].  $C_s$  and  $C_i$  is the boundary layer and internal  $\text{CO}_2$  concentration [ $\mu\text{mol m}^{-3}$ ], respectively.  $\rho_a$  is the specific mass of air [ $1.2047 \text{ kg m}^{-3}$ ].  $M_a$  is the molecular mass

of dry air [28.96 g mol<sup>-1</sup>].  $p$  is atmospheric pressure [hPa]. A detailed description of the calculations for  $A_n$ ,  $C_s$ ,  $C_i$  is given in [Section 1.3](#).

40

Energy transferred via conduction between the surface and the atmosphere without state changes is defined as the sensible heat flux (H), which is calculated as (Troufleau et al., 1997):

$$H = \rho_a c_p \frac{T_s - T_a}{r_a} \quad (S5)$$

45

where  $\rho_a$  is mean air density [1.2047 kg m<sup>-3</sup>].  $c_p$  is the specific heat of dry air [1004 J kg<sup>-1</sup> K<sup>-1</sup>].  $T_s$  and  $T_a$  are the surface and air temperature [°C], respectively.

The ground heat flux (G) is calculated by the thermal diffusion equation, which estimates the G from the integrated time difference for a discrete time series of temperatures (Bennett et al., 2008):

50

$$G(t) = \frac{\Gamma}{\sqrt{\pi}} \int_{t_0}^t \frac{T(s)}{t-s} ds \quad (S6)$$

where  $T(s)$  is the surface temperature at time  $s$ , and  $s$  is the integration variable.  $\Gamma$  is the thermal inertia of the soil [J m<sup>-2</sup> s<sup>-1/2</sup> K<sup>-1</sup>], calculated as (Murray and Verhoef, 2007):

$$\Gamma = \sqrt{\lambda_s C_s} \quad (S7)$$

55

where  $C_s$  is the volumetric heat capacity of the soil [J m<sup>-3</sup> K<sup>-1</sup>] and  $\lambda_s$  is the heat conductivity of the soil [J m<sup>-1</sup> s<sup>-1</sup> K<sup>-1</sup>].  $C_s$  is parametrised from the two components in the soil:

$$C_s = \rho_s c_s (1 - \theta_s) + \rho_w c_w \theta \quad (S8)$$

60

where  $\rho_s$  is the soil bulk density [ $1.5 \times 10^6$  g m<sup>-3</sup>].  $c_s$  is the specific heat of the soil solids [0.83 J g<sup>-1</sup> K<sup>-1</sup>].  $\rho_w c_w$  is the heat capacity of water [ $4.2 \times 10^6$  J m<sup>-3</sup> K<sup>-1</sup>].  $\theta_s$  is the saturated soil moisture content [0.35 m<sup>3</sup> m<sup>-3</sup>]. The thermal conductivity  $\lambda_s$  is a function of porosity [ $\varepsilon = 0.35$  m<sup>3</sup> m<sup>-3</sup>], sand and quartz fraction (similar to sand fraction, i.e., 0.7 in the study area).

## 65 **Energy balance closure assessment**

The energy balance closure (EBC) issues in EC systems have been widely observed and studied, represented as the turbulent fluxes (i.e., LE+H) not always equal to the difference between available energy and ground heat flux (i.e., Rn-G) (Foken, 2008). Before the EBC assessment, the measured G at 10 cm depth ( $G_{10cm}$ ) was calibrated to the ground heat flux  $G$  using calorimetric method (Gao et al., 2017):

70

$$G(t) = G_{zr}(t) + \sum_{I=1}^I C_{s,I}(t) \frac{\partial T_{s,I}}{\partial t} \delta Z_I \quad (S9)$$

where  $G_{zr}$  is the measured heat flux at a depth of  $zr$  ( $zr=10$  cm).  $I$  is the number of sublayers ( $I=1$ ).  $C_{s,I}$  is the volumetric soil heat capacity for sublayer  $I$  (Eq. (S8)), where the  $\theta$  becomes the average soil moisture of sublayer  $I$ .  $\frac{\partial T_{s,I}}{\partial t}$  is the change in the soil temperature with time for sublayer  $I$  and the unit of  $t$  is seconds.  $\delta Z_I$  is the thickness of sublayer  $I$  ( $\delta Z_I=0.1$  m). The soil temperature and moisture of sublayer  $I$  are the average of simulated

75

surface temperature and soil moisture from STEMMUS-SCOPE and observed soil temperature and soil moisture at 10 cm depth, respectively. The data and the process for deriving  $G$  can be accessed through the GitHub hyperlink provided in the manuscript. In this study, the observations of soil water content (SWC) and soil temperature ( $T_s$ ) at 10 cm soil depth in 2016 and 2017 were absent, thereby the  $G_{10cm}$  was failed to convert to  $G$ .  
 80 Therefore, only the energy fluxes in the growing season of 2018 and 2019 were valid for EBC assessment.

The slope (0.84) and intercept (19.11 W m<sup>-2</sup>) in this site are superior to the average slope (0.67) and intercept (28.9 W m<sup>-2</sup>) among eight EC sites of the ChinaFLUX network (Li et al., 2005). Thus, the EBC adjustment has  
 85 not been applied to observed LE and H data but discarding the data greater than the closure threshold of  $\pm 100$  Wm<sup>-2</sup> (Valayamkunnath et al., 2018). The closure threshold can be quantified as follows:

$$D = |(Rn - G) - (LE + H)| \quad (S10)$$

## 1.2 Water fluxes

90 With the simulated surface temperature as a boundary condition, STEMMUS model further simulates soil moisture and soil temperature under a two-phase mass and heat transfer mechanism. The governing equations are:

### *Soil water conservation equations*

$$\frac{\partial}{\partial t}(\rho_L \theta_L + \rho_V \theta_V) = -\frac{\partial}{\partial z}(q_L + q_V) - S \quad (S11)$$

where  $\rho_L$  and  $\rho_V$  are the density of liquid water and water vapor [kg m<sup>-3</sup>], respectively.  $\theta_L$  and  $\theta_V$  are the  
 95 volumetric water content for liquid and water vapor [m<sup>3</sup> m<sup>-3</sup>], respectively.  $z$  is the vertical space coordinate (positive upwards) [m].  $S$  is the sink term for the root water extraction which is calculated in Root Water Uptake (RWU) module [cm s<sup>-1</sup>].  $q_L$  and  $q_V$  are the liquid water flux and the water vapor flux [kg m<sup>-2</sup> s<sup>-1</sup>], expressed by three components: isothermal flux (denoted by “ $h$ ”, thermal flux (denoted by “ $T$ ”) and advective flux (denoted by “ $a$ ”).

$$100 \quad q_L = q_{Lh} + q_{LT} + q_{La} = \rho_L \frac{\partial}{\partial z} \left[ K \left( \frac{\partial h}{\partial z} + 1 \right) + D_{Ta} \frac{\partial T_s}{\partial z} + \frac{K}{\gamma_w} \frac{\partial P_g}{\partial z} \right]$$

$$q_V = q_{Vh} + q_{VT} + q_{Va} = \frac{\partial}{\partial z} \left[ D_{Vh} \frac{\partial h}{\partial z} + D_{VT} \frac{\partial T_s}{\partial z} + D_{Va} \frac{\partial P_g}{\partial z} \right] \quad (S12)$$

$K$  is the unsaturated hydraulic conductivity [m s<sup>-1</sup>].  $h$  is the pressure head [cm].  $T_s$  is the soil temperature [°C].  $P_g$   
 is the mixed pore-air pressure [Pa].  $\gamma_w$  is the specific weight of water [kg m<sup>-2</sup> s<sup>-2</sup>].  $D_{Ta}$  is the transport coefficient  
 for adsorbed liquid flow caused by the temperature gradient [kg m<sup>-1</sup> s<sup>-1</sup> (°C)<sup>-1</sup>].  $D_{Vh}$  is the isothermal vapor  
 105 conductivity [kg m<sup>-2</sup> s<sup>-1</sup>].  $D_{VT}$  is the thermal vapor diffusion coefficient [kg m<sup>-1</sup> s<sup>-1</sup> (°C)<sup>-1</sup>].  $D_{Va}$  is the advective  
 vapor transfer coefficient (Zeng et al., 2011b, a). Overall, the liquid water fluxes (i.e.,  $q_{Lh}$ ,  $q_{LT}$ , and  $q_{La}$ ) and water  
 vapor fluxes (i.e.,  $q_{Vh}$ ,  $q_{VT}$ , and  $q_{Va}$ ) are driven by the gradient of matric potential, temperature, and air pressure,  
 respectively (Wang et al., 2021).

### *Dry air transfer equations*

110 STEMMUS model introduces the dry air transport mechanism using Henry’s law to describe dissolved gases in soil water:

$$\frac{\partial}{\partial t} [\varepsilon \rho_{da} (S_a + H_c S_L)] = -\frac{\partial q_a}{\partial z} \quad (\text{S13})$$

where  $\varepsilon$  ( $= 0.35 \text{ m}^3 \text{ m}^{-3}$ ) is the porosity.  $\rho_{da}$  is the density of dry air [ $\text{kg m}^{-3}$ ].  $S_a$  ( $= 1 - S_L$ ) and  $S_L$  ( $= \theta_L / \varepsilon$ ) are the degree of air saturation and saturation in the soil, respectively.  $H_c$  ( $= 0.02$ ) is Henry's constant. The dry air flow  $q_a$  [ $\text{kg m}^{-2} \text{ s}^{-1}$ ] is driven by the dry air concentration and air pressure gradient:

$$q_a = \underbrace{D_e \frac{\partial \rho_{da}}{\partial z}}_{\text{Diffusive flux}} + \underbrace{\rho_{da} K_g \frac{\partial P_g}{\partial z}}_{\text{Advective flux}} - \underbrace{H_c \rho_{da} \frac{q_L}{\rho_L}}_{\text{Dispersive flux}} + \underbrace{\theta_a D_{Vg} \frac{\partial \rho_{da}}{\partial z}}_{\text{Dissolved air}} \quad (\text{S14})$$

$D_e$  is the molecular diffusivity of water vapour in soil [ $\text{m}^2 \text{ s}^{-1}$ ].  $K_g$  is the intrinsic air permeability [ $\text{m}^2$ ].  $q_L$  is the liquid water flux [ $\text{kg m}^{-2} \text{ s}^{-1}$ ].  $\theta_a$  ( $= \theta_v$ ) is the volumetric fraction of dry air in the soil, and  $D_{Vg}$  is the gas-phase longitudinal dispersion coefficient [ $\text{m}^2 \text{ s}^{-1}$ ] (Zeng et al., 2011b, a).

### ***Soil water content in the root zone***

The SWC in the root zone is calculated as (Yu et al., 2016):

$$\begin{aligned} SWC_{rzone} &= \sum_{rz} \Delta x_i \frac{\theta_i + \theta_{i+1}}{2} \\ &= \sum_{rz} (x_i - x_{i-1}) \frac{\theta_i + \theta_{i+1}}{2} \end{aligned} \quad (\text{S15})$$

where  $SWC_{rzone}$  is the volumetric soil water content in the root zone at each timestep  $ts$ ;  $\Delta x_i$  is the thickness of the  $i$ th soil layer;  $\theta_i$  and  $\theta_{i+1}$  are the simulated soil water content at the upper and lower surface, respectively. In the study area, the roots of shrubs exist in between the 2<sup>nd</sup> layer to 38<sup>th</sup> layer, i.e., rooting depth from 0.02 m to 2 m.

### ***Evapotranspiration***

The evapotranspiration (ET) is the sum of the evaporation and transpiration [ $\text{mm 30-min}^{-1}$ ]. Evaporation and Transpiration are calculated from the latent heat fluxes of soil ( $LE_{stot}$ ) and canopy ( $LE_{ctot}$ ), respectively.

$$\text{Transpiration} = \frac{LE_{ctot}}{\lambda} \quad (\text{S16})$$

$$\text{Evaporation} = \frac{LE_{stot}}{\lambda} \quad (\text{S17})$$

where the  $\lambda$  is the latent heat of vaporization of liquid water [ $2.454 \times 10^6 \text{ MJ m}^{-2}$ ].

## **1.3 Carbon fluxes**

### ***Gross primary productivity***

The C3 Photosynthesis can be expressed as the minimum of two processes (Farquhar et al., 1980): (a) carboxylation rate limited by Ribulose biphosphate-carboxylase-oxygenase activity (i.e., enzyme-limited,  $V_c$ , described as Eq. (S18)) or (b) carboxylation rate limited by Ribulose 1-5 biphosphate regeneration rate (i.e., electron transport/light -limited,  $V_e$ , described as Eq. (S19) (Bayat et al., 2019; Wang et al., 2021):

$$V_c = V_{cmax} \cdot WSF \cdot \frac{C_i - \Gamma^*}{C_i + K_c(1 + \frac{O_i}{K_o})} \quad (S18)$$

$$145 \quad V_e = \frac{J(C_i - \Gamma^*)}{5(C_i + 2\Gamma^*)} \cdot \frac{-b \pm \sqrt{b^2 - 4ac}}{2a} \quad (S19)$$

$V_{cmax}$  is the maximum carboxylation rate [ $\mu\text{mol m}^{-2} \text{s}^{-1}$ ].  $WSF$  is the water stress factor calculated as Eqs. (S20) - (S21).  $C_i$  is the internal  $\text{CO}_2$  concentration [ $\mu\text{mol m}^{-3}$ ] and the first  $C_i$  is calculated by the equation  $C_i = C_a(1 - \frac{1}{mRH})$  and the following  $C_i$  is obtained by iteration of Eq. (S26).  $\Gamma^*$  is the  $\text{CO}_2$  compensation point in the absence of mitochondrial respiration.  $K_c$  and  $K_o$  are the Michaelis-Menten constants for carboxylation and oxygenation [150] [ $\mu\text{mol m}^{-3}$ ], respectively.  $O_i$  is the leaf internal oxygen concentration [ $\mu\text{mol m}^{-3}$ ] and  $J$  is the electron transport rate [ $\mu\text{mol m}^{-2} \text{s}^{-1}$ ].

$$WSF_i = \frac{1}{1 + e^{-100\theta_s(\theta - \frac{\theta_f + \theta_r}{2})}} \cdot bbx \quad (S20)$$

$$WSF = \sum_{i=1}^n RF(i) \cdot WSF_i \quad (S21)$$

where  $WSF_i$  is the  $WSF$  at  $i^{th}$  soil layer, determined by the soil hydraulic properties.  $bbx$  indicates whether the root exists.  $RF(i)$  is the ratio of root length at  $i^{th}$  soil layer to total root length. In addition to the  $V_c$  and  $V_e$ , the key variables solved within the Farquhar model are described in Eqs. (S22) – (S24):

$$A_g = \min(V_c, V_e) = A_n + R_d \quad (S22)$$

$$R_d = Rdparam \cdot V_{cmax} \cdot \frac{e^{\log_{1.8} q_t}}{1 + e^{1.3(T - Trdm)}} \quad (S23)$$

$$C_s = C_a - \frac{(C_a - C_i)r_a}{r_a + r_s} \quad (S24)$$

160 where  $A_n$  and  $A_g$  are the net and gross photosynthesis [ $\mu\text{mol m}^{-2} \text{s}^{-1}$ ], respectively.  $R_d$  is the dark respiration, calculated by multiplying its fraction of  $V_{cmax}$  ( $Rdparam = 0.025$ ) with the temperature corrected  $V_{cmax}$ .  $q_t = 0.1 * (T - Tref)$ , where  $T$  is the temperature of leaf in shade and  $Tref$  [K] is the absolute temperature at 25 °C;  $Trdm$  is the temperature at which respiration is lower than half that predicted by the proportional change in respiration with a 10 °C increase in temperature ( $Q_{10} = 2$ ).  $C_a$  and  $C_s$  are the  $\text{CO}_2$  concentration in the atmosphere and boundary layer [165] [ $\mu\text{mol m}^{-3}$ ], respectively.

Based on the relationship between photosynthesis and  $g_s$  for  $\text{H}_2\text{O}$  and  $\text{CO}_2$  diffusion (Eq. (S4) & Eq.(S26)), the Eqs. (S18) - (S24) of the Farquhar model and the Eq. (S25) of the Ball-Berry model are solved jointly to derive three unknown variables  $A_n$ ,  $g_s$  and  $C_i$  :

$$170 \quad g_s = \max(b, m \frac{A_n \times RH}{C_s} + b) \quad (S25)$$

where the unit of  $g_s$  is [ $\mu\text{mol m}^{-2} \text{s}^{-1}$ ].  $m$  and  $b$  are the slope and intercept [unitless] of Ball-Berry stomatal conductance model (Collatz et al., 1991).  $RH$  is relative humidity at the leaf surface [%]. At each iteration, the internal  $\text{CO}_2$  concentration is updated as Eq. (S25) based on the Fick's Law,

$$175 \quad C_i = C_s - 1.6 \frac{A_n}{g_s} \quad (S26)$$

where factor 1.6 accounts for conversion from conductance for  $\text{H}_2\text{O}$  to  $\text{CO}_2$  diffusion.

## 1.4 Model input

The governing variables and critical parameters to drive the model are listed in Table S1, which are estimated based on local experts, literature and calibration performance (Jiang et al., 2021; Liang et al., 2021; Jackson et al., 1997; Lai et al., 2016; Abu-Hamdeh, 2003; Jia et al., 2018; Wei et al., 2019; Gong et al., 2016; Mwangi et al., 2020; Montzka et al., 2017). China Meteorological Forcing Dataset (CMFD) developed by He et al. (2020) was validated with available forcing data, further used as the supplementary data to fill the data gap in the forcing data.

**Table S1. Governing variables and parameters for the STEMMUS-SCOPE model in Yanchi County, China.**

| Symbol                                                    | Variables                                 | Unit                                    | Value                                                                                            |                       |
|-----------------------------------------------------------|-------------------------------------------|-----------------------------------------|--------------------------------------------------------------------------------------------------|-----------------------|
| <b>Half-hourly time series of meteorological forcings</b> |                                           |                                         |                                                                                                  |                       |
| rainfall                                                  | Precipitation                             | [mm]                                    |                                                                                                  |                       |
| T <sub>a</sub>                                            | Air temperature                           | [°C]                                    |                                                                                                  |                       |
| RH                                                        | Relative humidity                         | [%]                                     |                                                                                                  |                       |
| p                                                         | Atmospheric pressure <sup>a</sup>         | [hPa]                                   |                                                                                                  |                       |
| u                                                         | Wind speed <sup>b</sup>                   | [m s <sup>-1</sup> ]                    | Figure S1                                                                                        |                       |
| CO <sub>2</sub>                                           | Carbon dioxide concentration              | [mg m <sup>-3</sup> ]                   |                                                                                                  |                       |
| R <sub>li</sub>                                           | Incoming longwave radiation               | [W m <sup>-2</sup> ]                    |                                                                                                  |                       |
| R <sub>in</sub>                                           | Incoming shortwave radiation              | [W m <sup>-2</sup> ]                    |                                                                                                  |                       |
| LAI                                                       | Leaf area index                           | [m <sup>2</sup> m <sup>-2</sup> ]       |                                                                                                  |                       |
| e <sub>a</sub>                                            | Air vapor pressure                        | [hPa]                                   | $e_a = \frac{e_s RH}{100} = 6.107 \times 10^{\frac{7.5 T_a}{237.3 + T_a}} \times \frac{RH}{100}$ |                       |
| VPD                                                       | Vapor pressure deficit                    | [hPa]                                   | $VPD = 6.107 \times 10^{\frac{7.5 T_a}{237.3 + T_a}} \left(1 - \frac{RH}{100}\right)$            |                       |
| T <sub>sur</sub>                                          | Soil surface temperature <sup>c</sup>     | [°C]                                    | Simulated by SCOPE model                                                                         |                       |
| <b>Canopy parameters</b>                                  |                                           | <b>Unit</b>                             | <b>C3 Shrub</b>                                                                                  | <b>C3 Grassland</b>   |
| V <sub>cmax</sub>                                         | Maximum carboxylation rate                | [μmol m <sup>-2</sup> s <sup>-1</sup> ] | 120                                                                                              | 120                   |
| Ballberry0                                                | Ball-Berry stomatal conductance parameter | [-]                                     | 0.025                                                                                            | 0.025                 |
| m                                                         |                                           | [-]                                     | 10.4                                                                                             | 7                     |
| h <sub>c</sub>                                            | Canopy height                             | [m]                                     | 1.4                                                                                              | 0.03                  |
| d                                                         | Leaf width                                | [m]                                     | 0.005                                                                                            | 0.002                 |
| LIDFa                                                     | Leaf inclination                          | [-]                                     | -0.46667                                                                                         | -0.46667              |
| LIDFb                                                     | Variation in leaf inclination             | [-]                                     | -0.15                                                                                            | -0.15                 |
| <b>Soil parameters and soil profiles</b>                  |                                           | <b>Unit</b>                             | <b>C3 Shrub</b>                                                                                  | <b>C3 Grassland</b>   |
| SWC                                                       | Initial soil water content                | [m <sup>3</sup> m <sup>-3</sup> ]       | Estimated based on in-situ measurement                                                           |                       |
| T <sub>s</sub>                                            | Initial soil temperature                  | [°C]                                    | Table S2                                                                                         |                       |
| K <sub>sat</sub>                                          | Saturated hydraulic conductivity          | [cm d <sup>-1</sup> ]                   | 288                                                                                              |                       |
| ε                                                         | Porosity                                  | [m <sup>3</sup> m <sup>-3</sup> ]       | 0.35                                                                                             |                       |
| θ <sub>s</sub>                                            | Saturated SWC                             | [m <sup>3</sup> m <sup>-3</sup> ]       | 0.35                                                                                             |                       |
| θ <sub>r</sub>                                            | Residual SWC                              | [m <sup>3</sup> m <sup>-3</sup> ]       | 0.006                                                                                            |                       |
| α                                                         | Van Genuchten parameters                  | [m <sup>-1</sup> ]                      | 0.0155                                                                                           |                       |
| n                                                         |                                           | [-]                                     | 1.71                                                                                             |                       |
| θ <sub>f</sub>                                            | Field capacity                            | [m <sup>3</sup> m <sup>-3</sup> ]       | 0.15                                                                                             |                       |
| ρ <sub>s</sub>                                            | Bulk density                              | [g cm <sup>-3</sup> ]                   | 1.5                                                                                              |                       |
| c <sub>s</sub>                                            | Specific heat of sandy soil               | [J g <sup>-1</sup> K <sup>-1</sup> ]    | 0.83                                                                                             |                       |
| <b>Root parameters</b>                                    |                                           | <b>Unit</b>                             | <b>Shrub</b>                                                                                     | <b>Grassland</b>      |
| RTB                                                       | Initial root total biomass                | [g m <sup>-2</sup> ]                    | 1500                                                                                             | 1000                  |
| RD                                                        | Biomass density                           | [gDM m <sup>-3</sup> ]                  | 4.5 × 10 <sup>5</sup>                                                                            | 2.1 × 10 <sup>5</sup> |
| RL                                                        | Maximum Rooting depth                     | [m]                                     | 2                                                                                                | 0.3                   |
| rroot                                                     | Root radius                               | [mm]                                    | 0.5                                                                                              | 0.2                   |

185 <sup>a</sup> Boundary condition for dry air transportation in the soil.

<sup>b</sup> Wind speed data of 2019 was obtained from ERA5 dataset because CMFD is only available till year 2018.

<sup>c</sup> Boundary condition for heat transport.

**Table S2. Initial soil profile for the simulation in 2018 (for calibration) and in 2016, 2017 and 2019 (for validation).**

| Depth           | 2016<br>(DOY 122 – DOY 274) |                                       | 2017<br>(DOY 121 - DOY 190) |                                       | 2018<br>(DOY 121 - DOY 212) |                                       | 2019<br>(DOY 122 - DOY 274) |                                       |
|-----------------|-----------------------------|---------------------------------------|-----------------------------|---------------------------------------|-----------------------------|---------------------------------------|-----------------------------|---------------------------------------|
|                 | Ts (°C)                     | SWC (m <sup>3</sup> m <sup>-3</sup> ) | Ts (°C)                     | SWC (m <sup>3</sup> m <sup>-3</sup> ) | Ts (°C)                     | SWC (m <sup>3</sup> m <sup>-3</sup> ) | Ts (°C)                     | SWC (m <sup>3</sup> m <sup>-3</sup> ) |
| 0 cm            | 20.5                        | 0.046                                 | 20                          | 0.046                                 | 17                          | 0.046                                 | 15                          | 0.08                                  |
| 10 cm           | 20.23                       | 0.046                                 | 19.5                        | 0.046                                 | 15.53                       | 0.046                                 | 14.5                        | 0.09                                  |
| 20 cm           | 20                          | 0.046                                 | 18                          | 0.046                                 | 13.34                       | 0.046                                 | 14                          | 0.09                                  |
| 50 cm           | 19                          | 0.06                                  | 17                          | 0.06                                  | 12.42                       | 0.06                                  | 13.5                        | 0.13                                  |
| 100 cm          | 16                          | 0.12                                  | 15                          | 0.12                                  | 11.98                       | 0.12                                  | 12.5                        | 0.12                                  |
| 150 cm          | 13                          | 0.11                                  | 13                          | 0.11                                  | 10.74                       | 0.11                                  | 11.5                        | 0.11                                  |
| 300 cm          | 10                          | 0.1                                   | 10                          | 0.1                                   | 9                           | 0.1                                   | 10                          | 0.1                                   |
| 500 cm (Bottom) | 8.3                         | 0.1                                   | 8.3                         | 0.1                                   | 8.3                         | 0.1                                   | 8.3                         | 0.1                                   |

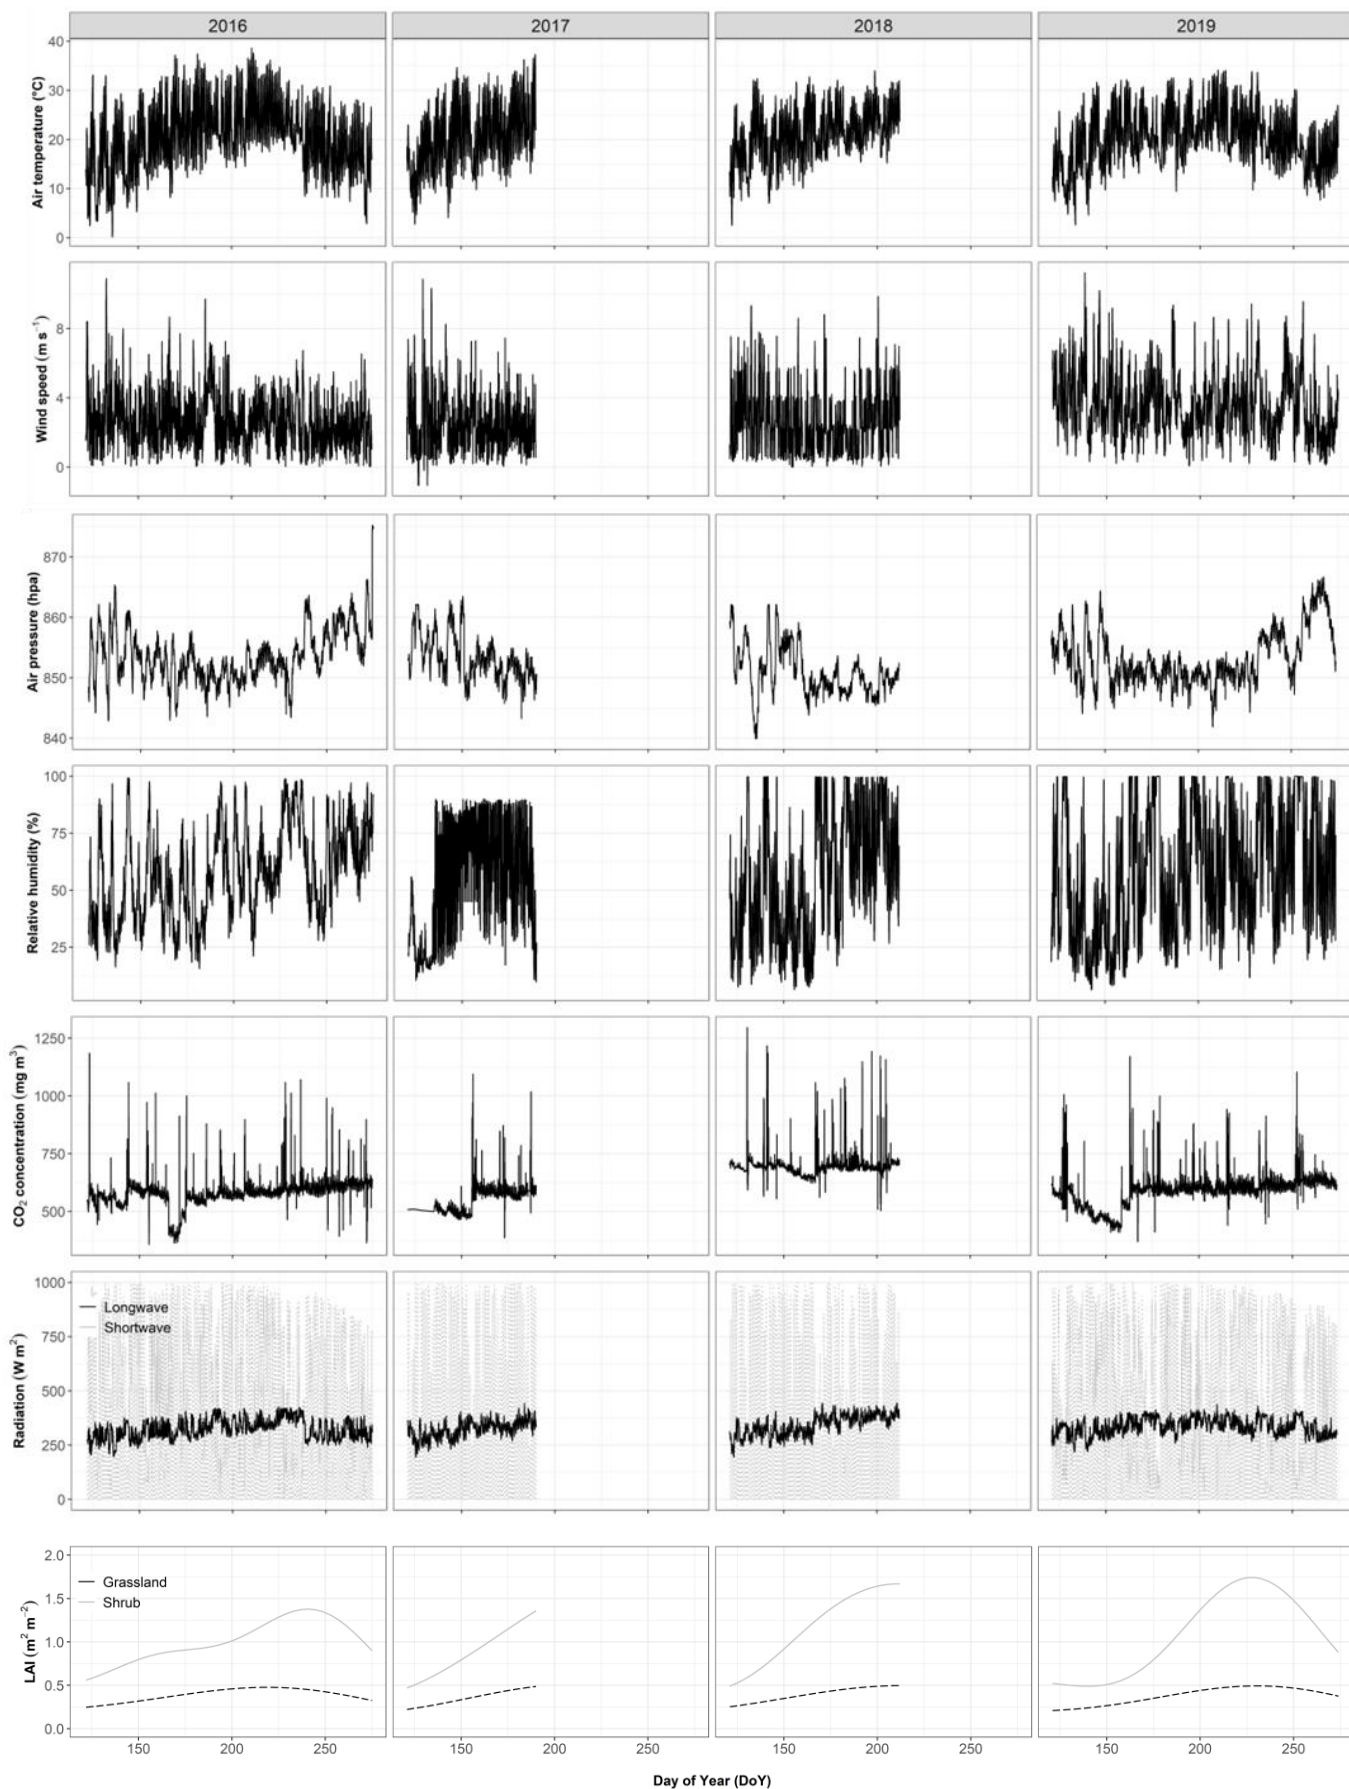

Figure S1. Input data for STEMMUS-SCOPE mode



## 2 Reconstructed LAI

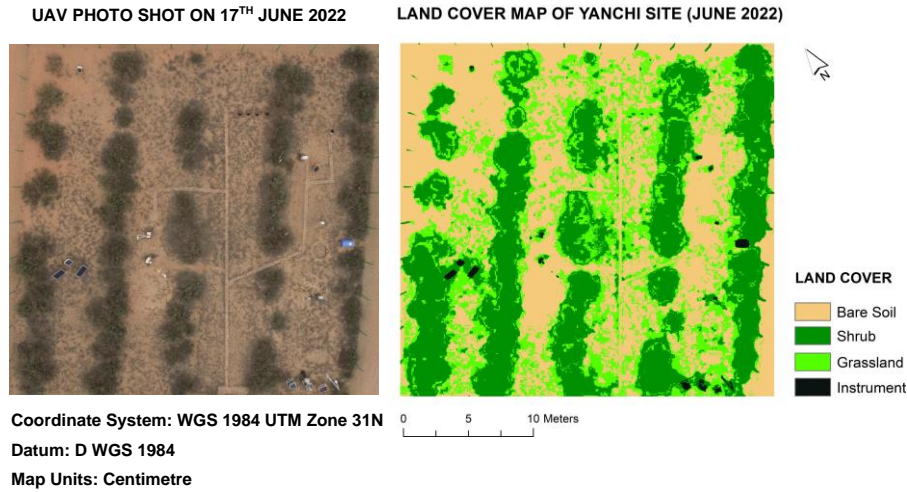

Figure S2. Land cover classification map.

200

Table S3. Parameters used in HANTS algorithm to smooth MODIS 4d LAI during 2016-2022 (Roerink et al., 2000; Abouali, 2011).

| Parameters | Description                                                  | Shrub | Grass |
|------------|--------------------------------------------------------------|-------|-------|
| ni         | total number of samples                                      | 622   | 622   |
| nb         | the length of the base period                                | 622   | 622   |
| nf*        | number of frequencies                                        | 30    | 15    |
| ts         | array of sample size                                         | 1:622 | 1:622 |
| low        | valid range minimum                                          | 0     | 0     |
| high*      | valid range maximum                                          | 2     | 0.5   |
| fet        | fit error tolerance                                          | 5     | 5     |
| dod        | degree of overdeterminedness                                 | 1     | 1     |
| delta      | small positive number (e.g. 0.1) to suppress high amplitudes | 0.1   | 0.1   |

\*To differentiate the LAI of different land covers, the curve-fitting process is mainly controlled by nf and high.

Table S4. Calculation of the actual LAI ( $LAI_a$ ) for shrub in different years.

| Year | Variable for Shrub                                  | DOY 160.5 | DOY 168.5 |
|------|-----------------------------------------------------|-----------|-----------|
| 2022 | $LAI_{HANTS\_2022}$                                 | 0.21      | 0.20      |
|      | $LAI_a_{2022}$ (calculate from measured $LAI_e$ ) * | 0.40      | 0.54      |
|      | $ratio = \frac{LAI_a_{2022}}{LAI_{HANTS\_2022}}$    | 1.92      | 2.73      |
| 2019 | $LAI_{HANTS\_2019}$                                 | 0.25      | 0.29      |
|      | $LAI_a_{2019} = ratio * LAI_{HANTS\_2019}$          | 0.48      | 0.80      |
| 2018 | $LAI_{HANTS\_2018}$                                 | 0.48      | 0.55      |
|      | $LAI_a_{2018} = ratio * LAI_{HANTS\_2018}$          | 0.93      | 1.49      |
| 2017 | $LAI_{HANTS\_2017}$                                 | 0.40      | 0.45      |
|      | $LAI_a_{2017} = ratio * LAI_{HANTS\_2017}$          | 0.77      | 1.24      |
| 2016 | $LAI_{HANTS\_2016}$                                 | 0.37      | 0.38      |
|      | $LAI_a_{2016} = ratio * LAI_{HANTS\_2016}$          | 0.71      | 1.05      |

\*  $LAI_e$  is the effective LAI measured by LAI-2200C (LAI-2200C, LI-COR Inc., USA). The  $LAI_e$  was converted into the  $LAI_a$  according to a fitting equation  $LAI_e = 2.517 LAI_a + 0.2245$  (Tang et al., 2014).

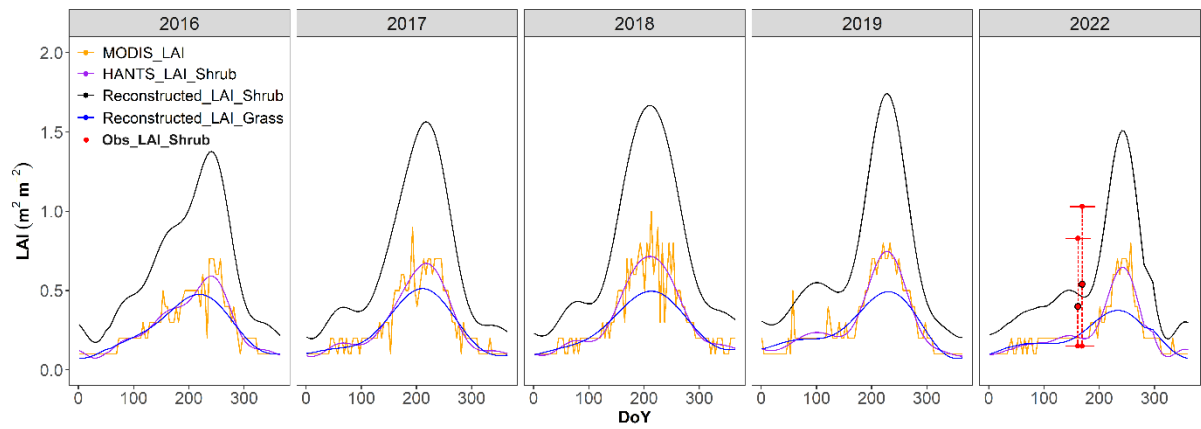

205

**Figure S3. Reconstructed 4-day LAI for shrubs and grasses, respectively. HANTS\_LAI\_Shrub in purple represents the smoothed MODIS\_LAI with the setting of  $nf=30$  and  $high=2$  in HANTS algorithm and then Reconstructed\_LAI\_Shrub in black is derived by multiplying HANTS\_LAI\_Shrub by 2.33. Reconstructed\_LAI\_Grass in blue is obtained by smoothing the MODIS\_LAI with  $nf=15$  and  $high=0.5$  in HANTS algorithm. The red dots (Obs\_LAI\_Shrub) are the LAI<sub>a</sub> calculated from LAI<sub>e</sub> measured in June 2022 (Table S4), where the dotted lines represent the range of LAI<sub>a</sub>.**

210

### 215 3 Sensitivity analysis

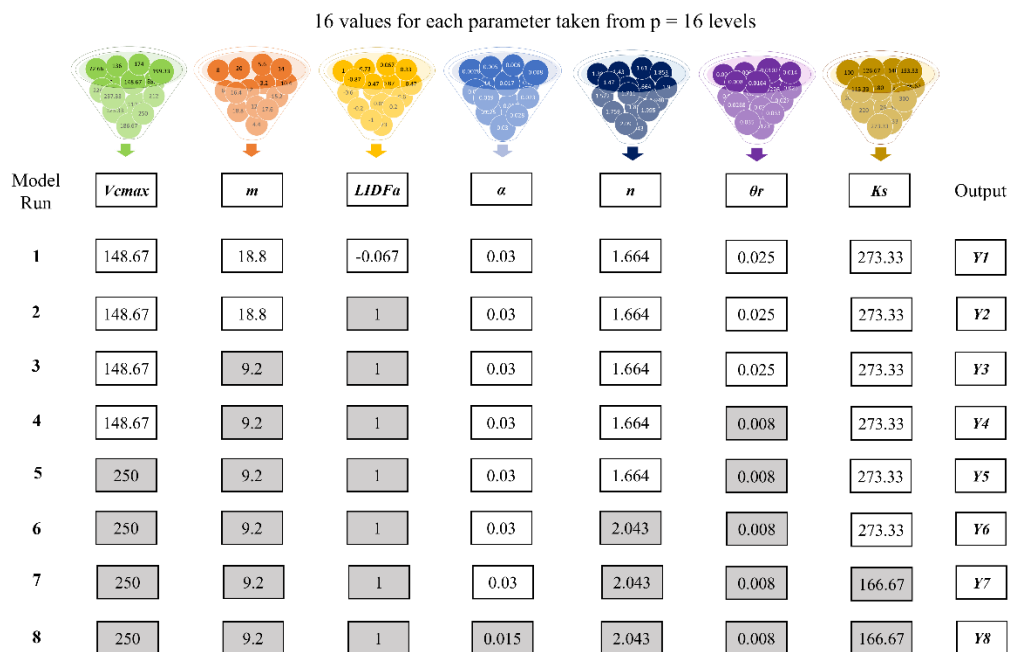

**Figure S4. Sampling strategy of Morris method used in this study: an example of one of the trajectories ( $r = 20$ ) from  $p^k$  ( $16^7$ ) sampling space. Model run NO.1 is one of the parameters combinations randomly selected from  $16^7$  sampling space, as a starting point for a trajectory. Each trajectory includes eight model runs, which resulted in total  $20 \times 8 = 160$  model runs in SA. Filled grids indicate the parameter values that was being modified.**

220

225 The output of Morris sensitivity analysis are: (i)  $\mu^*$  for assessing the influence of a parameter on the simulations (Campolongo et al., 2007), (ii)  $\sigma$  for measuring the interactions between parameters (Morris, 1991).

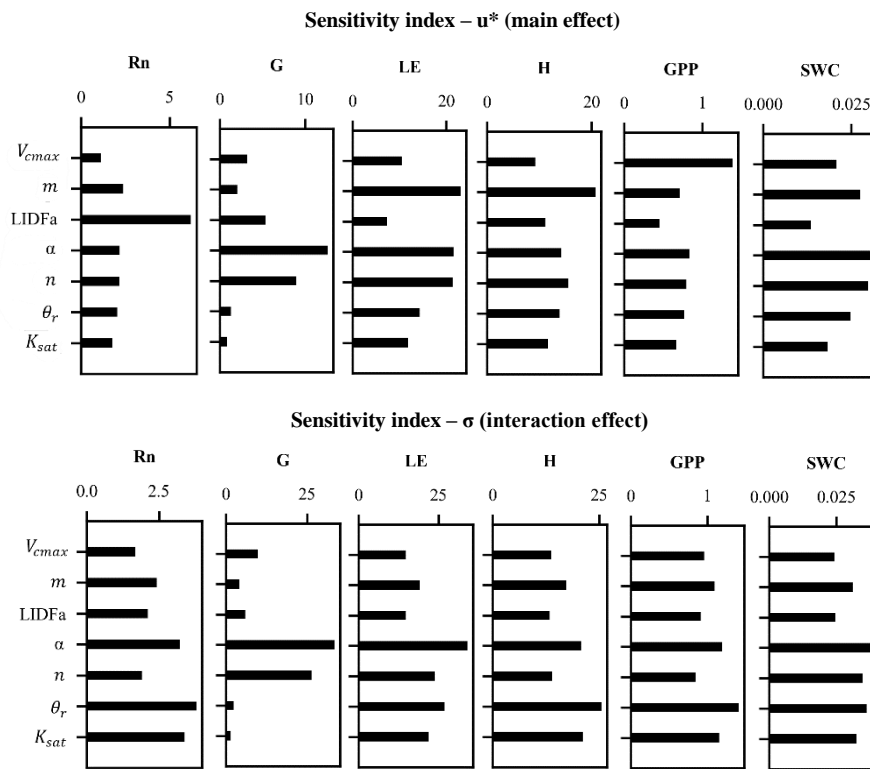

**Figure S5. The sensitivity index of parameters to modelled net radiation (Rn), ground heat flux (G), latent heat flux (LE) and sensible heat flux (H), soil water content (SWC) and gross primary productivity (GPP) over May to July in 2018.**

230

## 4 Performance of model calibration

### SWC and Soil Temperature

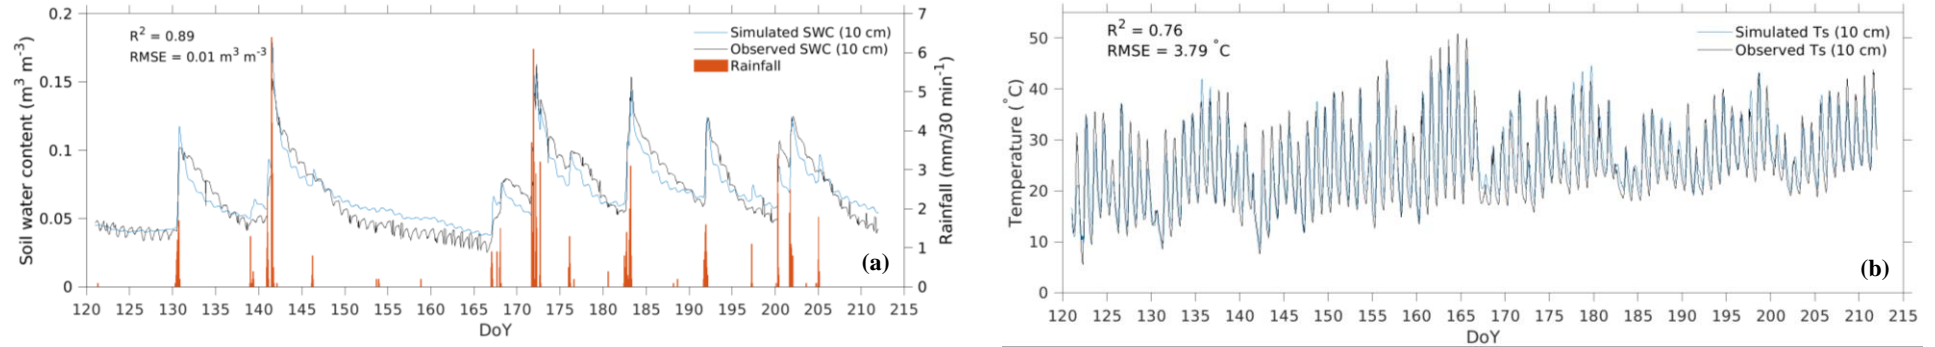

235 **Figure S6. Temporal dynamics of simulated (a) soil water content (SWC) and (b) soil temperature (Ts) at 10 cm depth from grass grid modelling (i.e., grassland ecosystem) versus observed values during May–September in 2018.**

### Energy fluxes and GPP

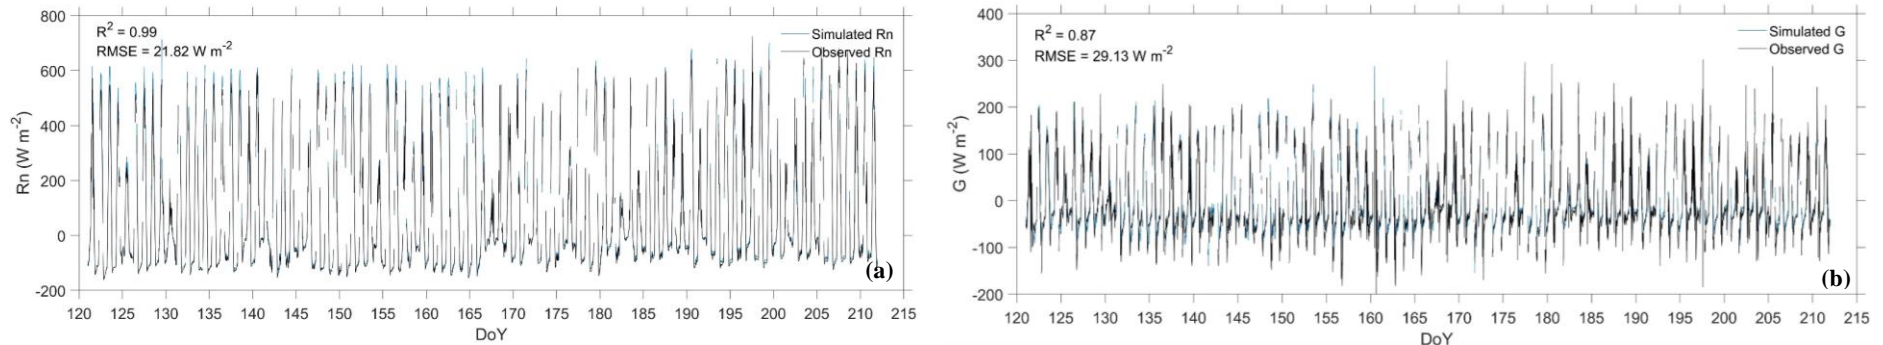

240 **Figure S7. Temporal dynamics of composited (a) Net Radiation (Rn) and (b) Ground Heat Flux (G) that aggregated from simulated fluxes from shrub grid (58.33%) and grass grid (41.67%) (i.e., shrubs-grassland ecosystem) versus observations during May–July in 2018.**

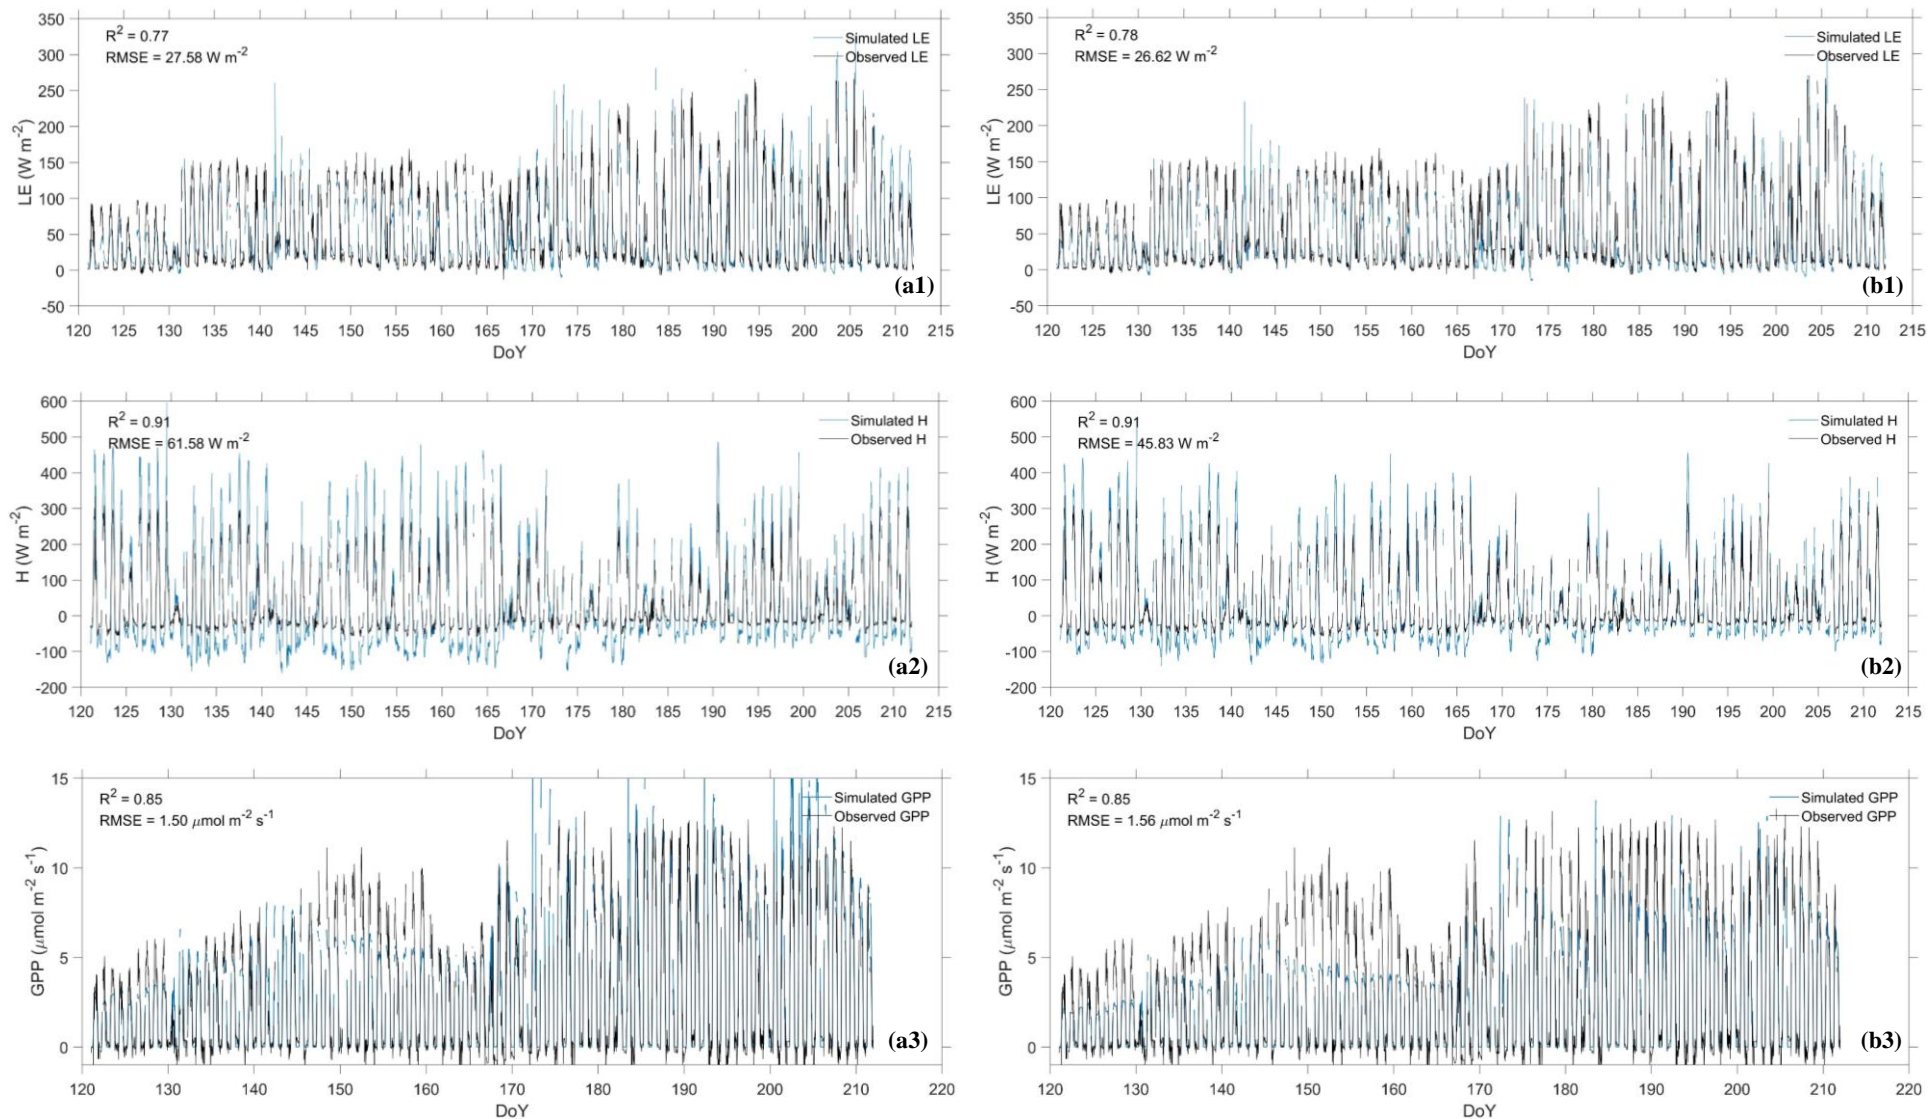

**Figure S8. Comparison of simulated latent heat flux (LE), sensible heat flux (H) and gross primary productivity (GPP) from: (a) shrub grid modelling and (b) aggregated fluxes from both shrub grid and grass grid during May–July in 2018.**

**Table S5. Comparison of summary statistics between model validation (Val) and calibration (Cal).**

|            | <b>Period</b> | <b>Samples (n)</b> | <b>R<sup>2</sup></b> | <b>RMSE</b>                               |
|------------|---------------|--------------------|----------------------|-------------------------------------------|
| <b>SWC</b> | Cal           | 4368               | 0.89                 | 0.01 m <sup>3</sup> m <sup>-3</sup>       |
|            | Val           | 7344               | 0.87                 | 0.01 m <sup>3</sup> m <sup>-3</sup>       |
| <b>Ts</b>  | Cal           | 4368               | 0.76                 | 3.79 °C                                   |
|            | Val           | 7344               | 0.86                 | 2.72 °C                                   |
| <b>Rn</b>  | Cal           | 3908               | 0.99                 | 21.82 W m <sup>-2</sup>                   |
|            | Val           | 16740              | 0.91                 | 66.92 W m <sup>-2</sup>                   |
| <b>G</b>   | Cal           | 3908               | 0.87                 | 29.13 W m <sup>-2</sup>                   |
|            | Val           | 6083               | 0.89                 | 19.17 W m <sup>-2</sup>                   |
| <b>LE</b>  | Cal           | 3908               | 0.78                 | 26.62 W m <sup>-2</sup>                   |
|            | Val           | 16740              | 0.66                 | 34.92 W m <sup>-2</sup>                   |
| <b>H</b>   | Cal           | 3908               | 0.91                 | 45.83 W m <sup>-2</sup>                   |
|            | Val           | 16740              | 0.77                 | 60.75 W m <sup>-2</sup>                   |
| <b>GPP</b> | Cal           | 3908               | 0.85                 | 1.56 μmol m <sup>-2</sup> s <sup>-1</sup> |
|            | Val           | 16740              | 0.68                 | 1.81 μmol m <sup>-2</sup> s <sup>-1</sup> |



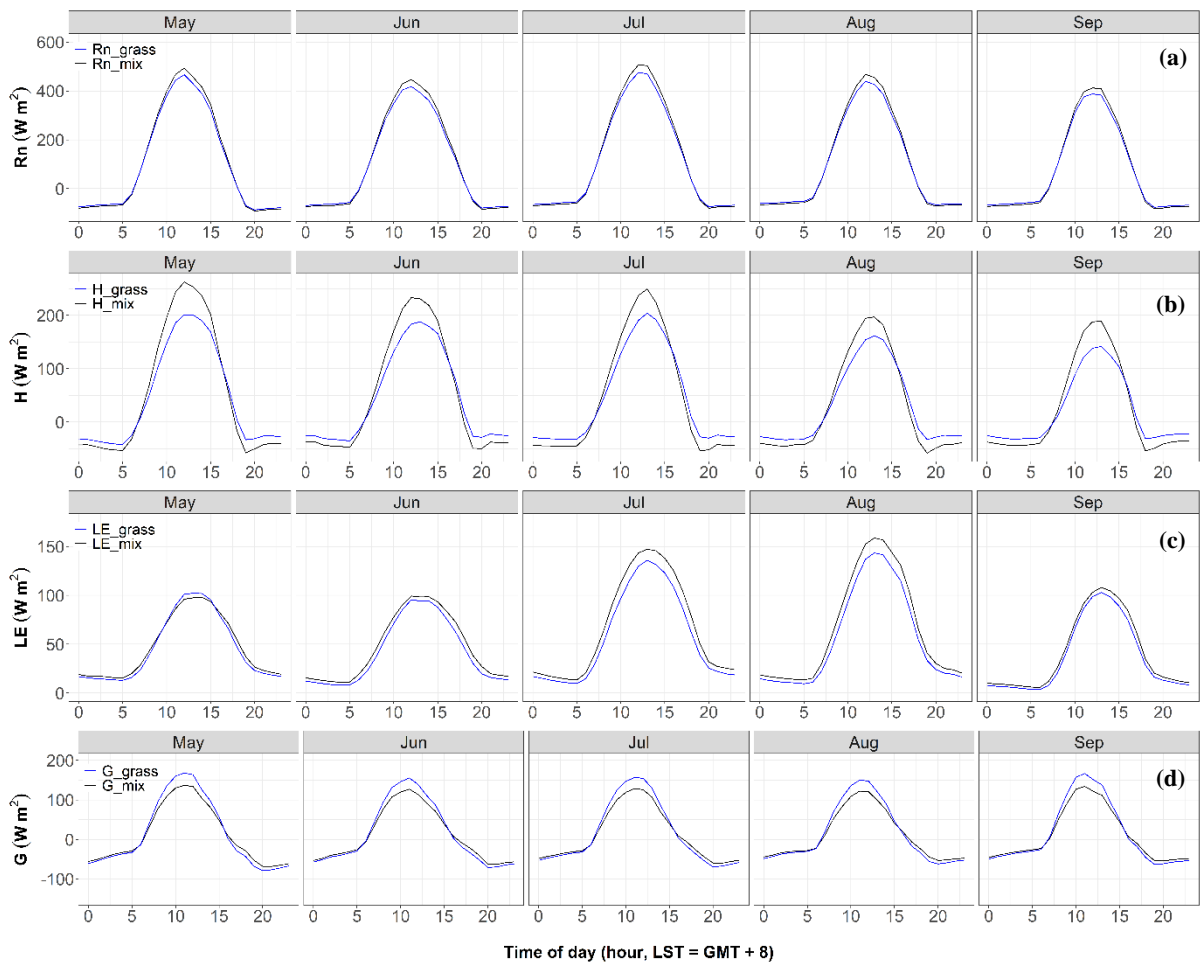

**Figure S9.** Diurnal courses of (a) net radiation (Rn), (b) sensible heat flux (H), (c) latent heat flux (LE) and (d) ground heat flux (G) during May–September in 2016 and 2019. Hereafter, the ‘grass’ in the legend denotes grassland ecosystem and ‘mix’ denotes shrubs-grassland ecosystem.

250

**Table S6.** Seasonal averaged value of simulated SWC under shrubland and grassland.

| SWC unit: [m <sup>3</sup> m <sup>-3</sup> ] | Growing season in 2016  |               | Growing season in 2019     |               |
|---------------------------------------------|-------------------------|---------------|----------------------------|---------------|
|                                             | Grassland               | Shrub         | Grassland                  | Shrub         |
| <b>Rainfall</b><br>(Sum)                    | 218.1 mm ( <i>dry</i> ) |               | 292.4 mm ( <i>normal</i> ) |               |
| <b>10 cm SWC</b><br>(Mean ± SD)             | 0.068 ± 0.019           | 0.051 ± 0.02  | 0.073 ± 0.02               | 0.067 ± 0.02  |
| <b>Difference</b><br>(Shrub – Grassland)    | – 0.017 ± 0.006         |               | – 0.006 ± 0.008            |               |
| <b>100 cm SWC</b><br>(Mean ± SD)            | 0.085 ± 0.011           | 0.061 ± 0.013 | 0.088 ± 0.010              | 0.072 ± 0.014 |
| <b>Difference</b><br>(Shrub – Grassland)    | – 0.023 ± 0.009         |               | – 0.016 ± 0.009            |               |

255

**Table S7. Seasonal Evaporation, Transpiration and Evapotranspiration (ET) of two ecosystems.**

|                                          | Growing season in 2016  |                     | Growing season in 2019     |                     |
|------------------------------------------|-------------------------|---------------------|----------------------------|---------------------|
| Unit: [mm season <sup>-1</sup> ]         | Grassland               | Shrub and grassland | Grassland                  | Shrub and grassland |
| <b>Rainfall</b><br>(Sum)                 | 218.1 mm ( <i>dry</i> ) |                     | 292.4 mm ( <i>normal</i> ) |                     |
| <b>Evaporation</b><br>(Sum ± SD)         | 169.94 ± 95.39          | 119.40 ± 76.35      | 191.22 ± 112.11            | 161.47 ± 98.18      |
| <b>Difference</b><br>(Shrub – Grassland) | –50.54 ± 27.67          |                     | –29.76 ± 29.47             |                     |
| <b>Transpiration</b><br>(Sum ± SD)       | 74.27 ± 28.36           | 138.36 ± 58.37      | 73.87 ± 33.92              | 156.13 ± 93.71      |
| <b>Difference</b><br>(Shrub – Grassland) | 64.42 ± 35.56           |                     | 82.26 ± 61.17              |                     |
| <b>ET</b><br>(Sum ± SD)                  | 244.21 ± 112.84         | 258.09 ± 116.58     | 265.09 ± 135.05            | 317.59 ± 163.85     |
| <b>Difference</b><br>(Shrub – Grassland) | 13.88 ± 26.06           |                     | 52.50 ± 46.53              |                     |

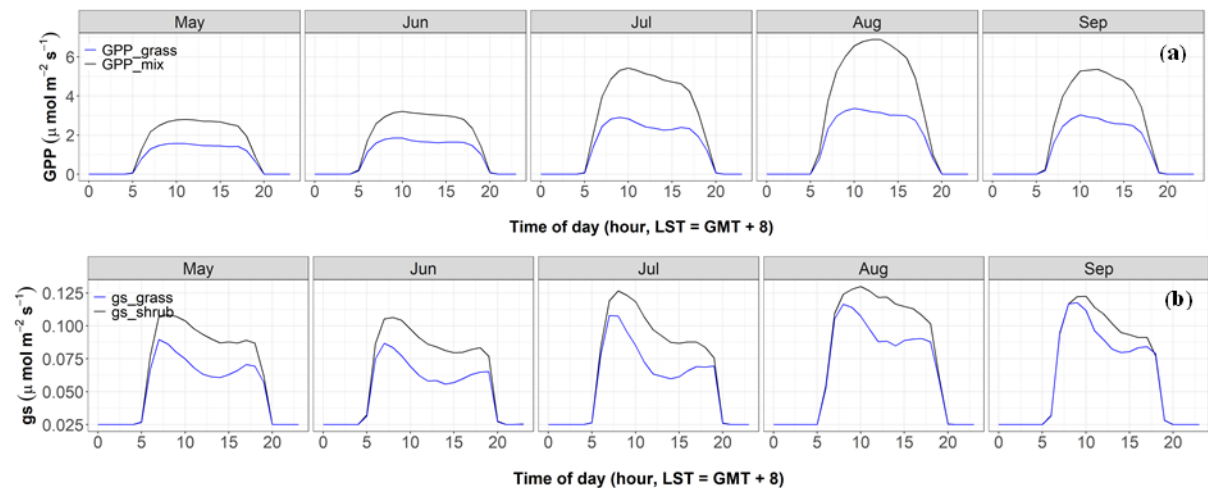

**Figure S10. Diurnal courses of simulated (a) Gross Primary Productivity (GPP) and (b) stomatal conductance (gs) of two ecosystems during May–September in 2016 and 2019.**

260

**Table S8. Seasonal simulated Gross Primary Productivity (GPP) of two ecosystems.**

|                                                         | Growing season in 2016  |                     | Growing season in 2019     |                     |
|---------------------------------------------------------|-------------------------|---------------------|----------------------------|---------------------|
| GPP Unit:<br>[gC m <sup>-2</sup> season <sup>-1</sup> ] | Grassland               | Shrub and grassland | Grassland                  | Shrub and grassland |
| <b>Rainfall</b><br>(Sum)                                | 218.1 mm ( <i>dry</i> ) |                     | 292.4 mm ( <i>normal</i> ) |                     |
| <b>GPP</b><br>(Sum ± SD)                                | 179.97 ± 55.60          | 300.89 ± 104.58     | 191.03 ± 76.15             | 374.12 ± 178.47     |
| <b>Difference</b><br>(Shrub – Grassland)                | 120.92 ± 55.15          |                     | 183.09 ± 107.50            |                     |



## 6 Uncertainties in simulating LE and GPP

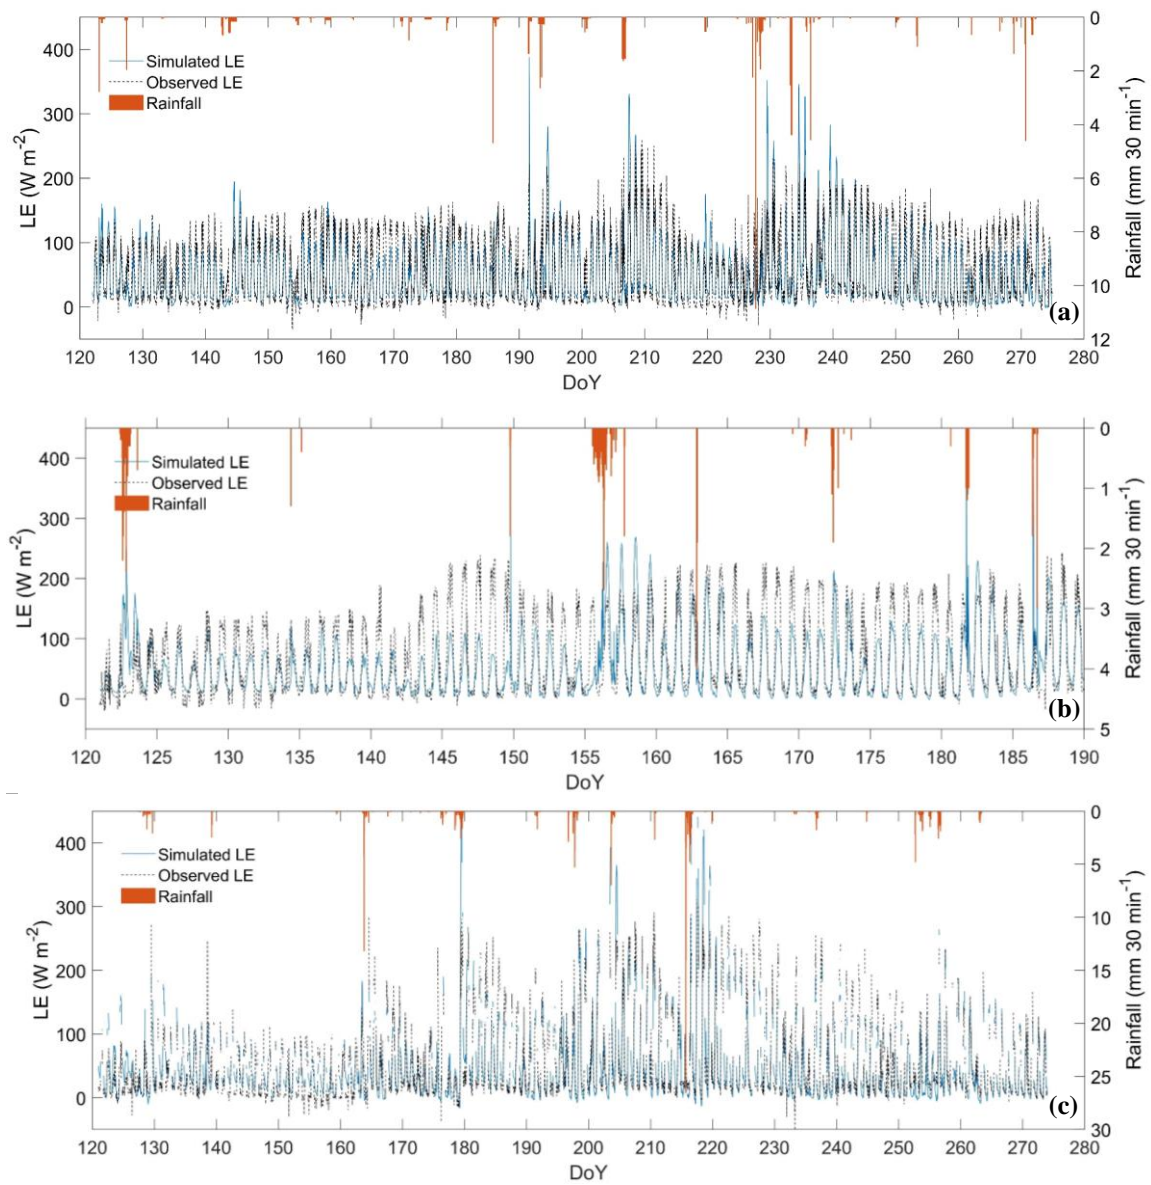

265 **Figure S11.** Comparison of the simulated and observed half-hour values of latent heat flux (LE) of shrubs-grassland ecosystem in (a) 2016, (b) 2017 and (c) 2019.

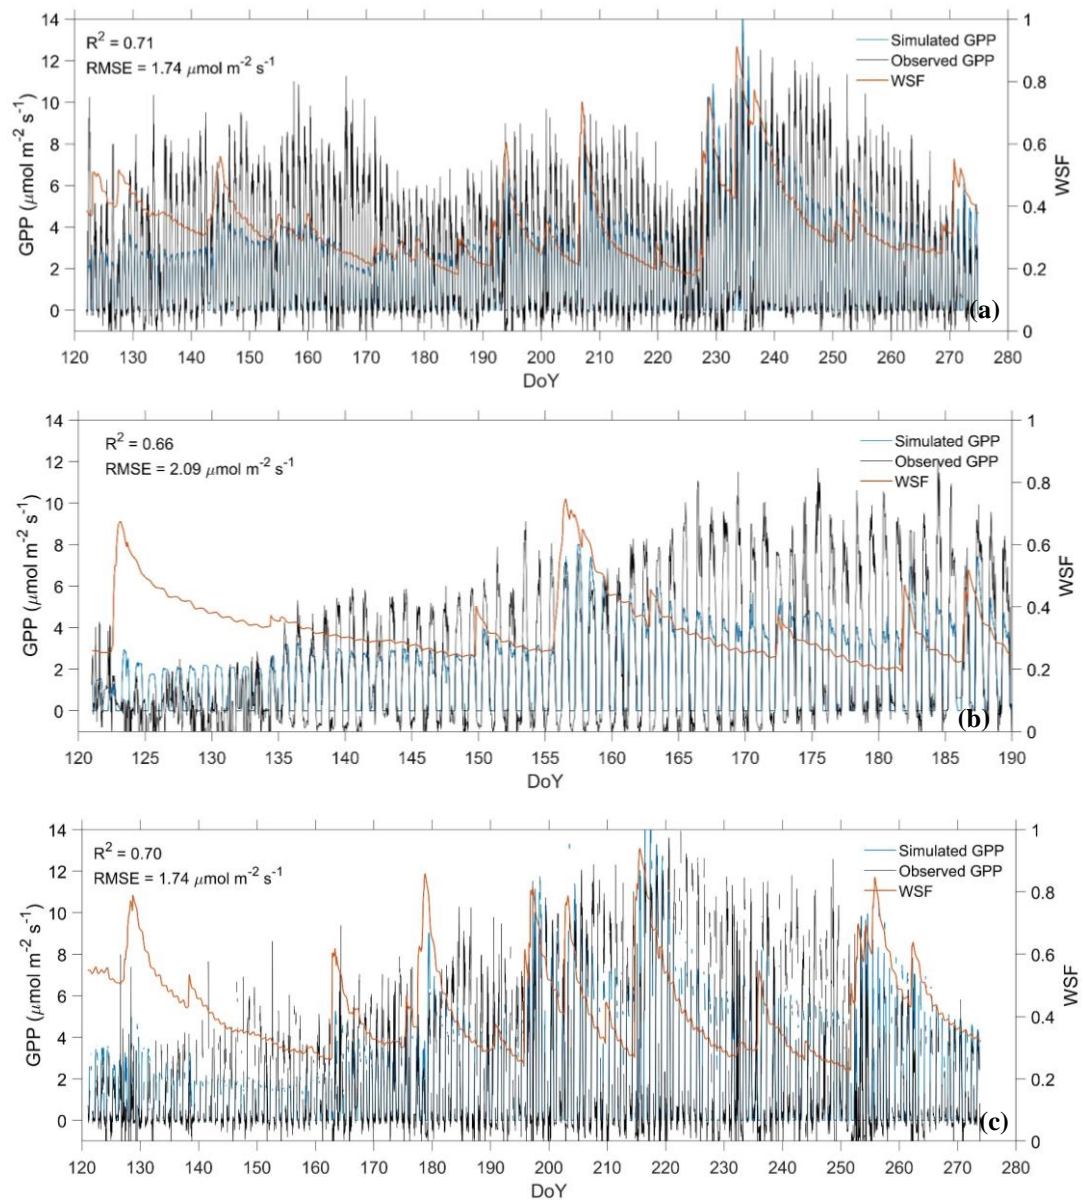

270 **Figure S12. Comparison of the simulated and observed half-hour values of gross primary productivity (GPP) of the shrubs-grassland ecosystem in (a) 2016, (b) 2017 and (c) 2019.**

275 **References**

Abouali, M.: MATLAB Implementation of Harmonic ANalysis of Time Series (HANTS), , <https://nl.mathworks.com/matlabcentral/fileexchange/38841-matlab-implementation-of-harmonic-analysis-of-time-series-hants>, 2011.

Abu-Hamdeh, N. H.: Thermal Properties of Soils as affected by Density and Water Content, *Biosyst. Eng.*, 86, 97–102, [https://doi.org/10.1016/S1537-5110\(03\)00112-0](https://doi.org/10.1016/S1537-5110(03)00112-0), 2003.

Bayat, B., van der Tol, C., Yang, P., and Verhoef, W.: Extending the SCOPE model to combine optical reflectance and soil moisture observations for remote sensing of ecosystem functioning under water stress conditions, *Remote Sens. Environ.*, 221, 286–301, <https://doi.org/10.1016/J.RSE.2018.11.021>, 2019.

Bennett, W. B., Wang, J., and Bras, R. L.: Estimation of Global Ground Heat Flux, *J. Hydrometeorol.*, 9, 744–759, <https://doi.org/10.1175/2008JHM940.1>, 2008.

Campolongo, F., Cariboni, J., and Saltelli, A.: An effective screening design for sensitivity analysis of large models, *Environ. Model. Softw.*, 22, 1509–1518, <https://doi.org/10.1016/J.ENVSOFT.2006.10.004>, 2007.

Collatz, G. J., Ball, J. T., Grivet, C., and Berry, J. A.: Physiological and environmental regulation of stomatal conductance, photosynthesis and transpiration: a model that includes a laminar boundary layer, *Agric. For. Meteorol.*, 54, 107–136, [https://doi.org/10.1016/0168-1923\(91\)90002-8](https://doi.org/10.1016/0168-1923(91)90002-8), 1991.

Farquhar, G. D., von Caemmerer, S., and Berry, J. A.: A biochemical model of photosynthetic CO<sub>2</sub> assimilation in leaves of C<sub>3</sub> species, *Planta* 1980 1491, 149, 78–90, <https://doi.org/10.1007/BF00386231>, 1980.

Foken, T.: The energy balance closure problem: an overview, *Ecol. Appl.*, 18, 1351–1367, <https://doi.org/10.1890/06-0922.1>, 2008.

Gao, Z., Russell, E. S., Missik, J. E. C., Huang, M., Chen, X., Strickland, C. E., Clayton, R., Arntzen, E., Ma, Y., and Liu, H.: A novel approach to evaluate soil heat flux calculation: An analytical review of nine methods, *J. Geophys. Res. Atmos.*, 122, 6934–6949, <https://doi.org/10.1002/2017JD027160>, 2017.

Gong, J., Jia, X., Zha, T., Wang, B., Kellomäki, S., and Peltola, H.: Modeling the effects of plant-interspace heterogeneity on water-energy balances in a semiarid ecosystem, *Agric. For. Meteorol.*, 221, 189–206, <https://doi.org/10.1016/J.AGRFORMET.2016.01.144>, 2016.

He, J., Yang, K., Tang, W., Lu, H., Qin, J., Chen, Y., and Li, X.: The first high-resolution meteorological forcing dataset for land process studies over China, *Sci. Data* 2020 71, 7, 1–11, <https://doi.org/10.1038/s41597-020-0369-y>, 2020.

Jackson, R. B., Mooney, H. A., and Schulze, E. D.: A global budget for fine root biomass, surface area, and nutrient contents, *Proc. Natl. Acad. Sci. U. S. A.*, 94, 7362–7366, <https://doi.org/10.1073/PNAS.94.14.7362>, 1997.

Jia, X., Zha, T., Gong, J., Zhang, Y., Wu, B., Qin, S., and Peltola, H.: Multi-scale dynamics and environmental controls on net ecosystem CO<sub>2</sub> exchange over a temperate semiarid shrubland, *Agric. For. Meteorol.*, 259, 250–259, <https://doi.org/10.1016/J.AGRFORMET.2018.05.009>, 2018.

Jiang, L., Liu, H., Peng, Z., Dai, J., Zhao, F., and Chen, Z.: Root system plays an important role in responses of plant to drought in the steppe of China, *L. Degrad. Dev.*, 32, 3498–3506, <https://doi.org/10.1002/LDR.3930>, 2021.

Lai, Z., Zhang, Y., Liu, J., Wu, B., Qin, S., and Fa, K.: Fine-root distribution, production, decomposition, and effect on soil organic carbon of three revegetation shrub species in northwest China, *For. Ecol. Manage.*, 359, 381–388, <https://doi.org/10.1016/J.FORECO.2015.04.025>, 2016.

Li, Z., Yu, G., Wen, X., Zhang, L., Ren, C., and Fu, Y.: Energy balance closure at ChinaFLUX sites, *Sci. China, Ser. D Earth Sci.*, 48, 51–62, <https://doi.org/10.1360/05ZD0005>, 2005.

Liang, M., Smith, N. G., Chen, J., Wu, Y., Guo, Z., Gornish, E. S., and Liang, C.: Shifts in plant composition

- mediate grazing effects on carbon cycling in grasslands, *J. Appl. Ecol.*, 58, 518–527, <https://doi.org/10.1111/1365-2664.13824>, 2021.
- Montzka, C., Herbst, M., Weihermüller, L., Verhoef, A., and Vereecken, H.: A global data set of soil hydraulic properties and sub-grid variability of soil water retention and hydraulic conductivity curves, *Earth Syst. Sci. Data*, 9, 529–543, <https://doi.org/10.5194/ESSD-9-529-2017>, 2017.
- Morris, M. D.: Factorial Sampling Plans for Preliminary Computational Experiments, *Technometrics*, 33, 161, <https://doi.org/10.2307/1269043>, 1991.
- Murray, T. and Verhoef, A.: Moving towards a more mechanistic approach in the determination of soil heat flux from remote measurements: I. A universal approach to calculate thermal inertia, *Agric. For. Meteorol.*, 147, 80–87, <https://doi.org/10.1016/J.AGRFORMET.2007.07.004>, 2007.
- Mwangi, S., Zeng, Y., Montzka, C., Yu, L., and Su, Z.: Assimilation of Cosmic-Ray Neutron Counts for the Estimation of Soil Ice Content on the Eastern Tibetan Plateau, *J. Geophys. Res. Atmos.*, 125, <https://doi.org/10.1029/2019JD031529>, 2020.
- Roerink, G. J., Menenti, M., and Verhoef, W.: Reconstructing cloudfree NDVI composites using Fourier analysis of time series, *Int. J. Remote Sens.*, 21, 1911–1917, <https://doi.org/10.1080/014311600209814>, 2000.
- Tang, S., Jia, X., Guo, J., Chen, Z., Zha, T., Qin, S., and Yang, L.: Measuring and modeling leaf area index for *Artemisia ordosica* (In Chinese), *Chinese J. Ecol.*, 33, 547–554, <https://doi.org/http://d.old.wanfangdata.com.cn/Periodical/stxzz201402040>, 2014.
- Troufleau, D., Lhomme, J. P., Monteny, B., and Vidal, A.: Sensible heat flux and radiometric surface temperature over sparse Sahelian vegetation. I. An experimental analysis of the kB–1 parameter, *J. Hydrol.*, 188–189, 815–838, [https://doi.org/10.1016/S0022-1694\(96\)03172-1](https://doi.org/10.1016/S0022-1694(96)03172-1), 1997.
- Valayamkunnath, P., Sridhar, V., Zhao, W., and Allen, R. G.: Intercomparison of surface energy fluxes, soil moisture, and evapotranspiration from eddy covariance, large-aperture scintillometer, and modeling across three ecosystems in a semiarid climate, *Agric. For. Meteorol.*, 248, 22–47, <https://doi.org/10.1016/J.AGRFORMET.2017.08.025>, 2018.
- Wallace, J. S. and Verhoef, A.: Interactions in mixed-plant communities: light, water and carbon dioxide. In: Marshall, Roberts (Eds.). *Leaf Development and Canopy Growth.*, in: *Sheffield Biological Science Series*, Sheffield Academic Press, 204–250, 2000.
- Wang, Y., Zeng, Y., Yu, L., Yang, P., Van der Tol, C., Yu, Q., Lü, X., Cai, H., and Su, Z.: Integrated modeling of canopy photosynthesis, fluorescence, and the transfer of energy, mass, and momentum in the soil-plant-Atmosphere continuum (STEMMUS-SCOPE v1.0.0), *Geosci. Model Dev.*, 14, 1379–1407, <https://doi.org/10.5194/gmd-14-1379-2021>, 2021.
- Wei, Y., Wang, Y., Han, J., Cai, M., Zhu, K., and Wang, Q.: Analysis of water retention characteristics of oil-polluted earthy materials with different textures based on van Genuchten model, *J. Soils Sediments*, 19, 373–380, <https://doi.org/10.1007/S11368-018-2026-Z>, 2019.
- Yu, L., Zeng, Y., Su, Z., Cai, H., and Zheng, Z.: The effect of different evapotranspiration methods on portraying soil water dynamics and et partitioning in a semi-arid environment in Northwest China, *Hydrol. Earth Syst. Sci.*, 20, 975–990, <https://doi.org/10.5194/HESS-20-975-2016>, 2016.
- Zeng, Y., Su, Z., Wan, L., and Wen, J.: A simulation analysis of the advective effect on evaporation using a two-phase heat and mass flow model, *Water Resour. Res.*, 47, <https://doi.org/10.1029/2011WR010701>, 2011 a.
- Zeng, Y., Su, Z., Wan, L., and Wen, J.: Numerical analysis of air-water-heat flow in unsaturated soil: Is it necessary to consider airflow in land surface models?, *J. Geophys. Res. Atmos.*, 116, D20107,

<https://doi.org/10.1029/2011JD015835>, 2011b.

360
